# Supplementary material
Source: Springer Nature journal article supplement (https://www.springermedizin.de/resource/supplementary/13063_2012_1105_MOESM3_ESM.pdf/9619390)

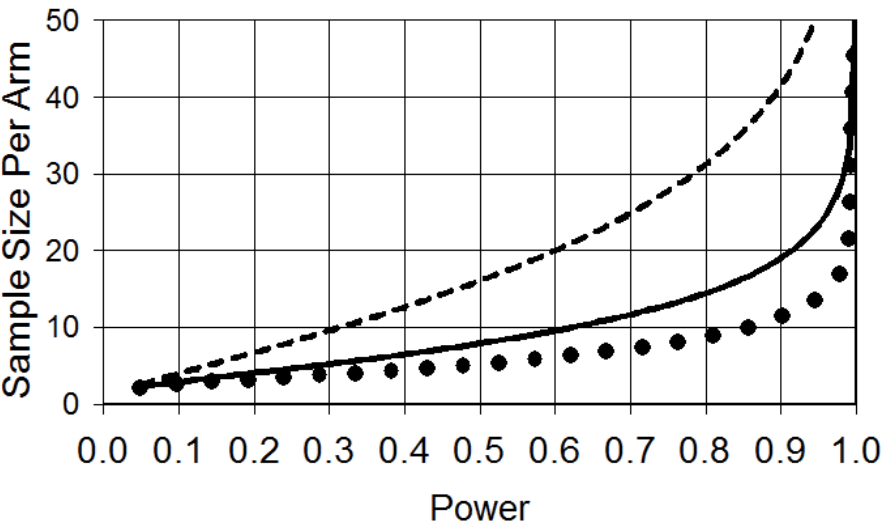

| <u>Δ Plasma Norepinephrine</u> | <u>N per Arm</u> |
|--------------------------------|------------------|
| — 450 pg/mL                    | 19               |
| - - - 300 pg/mL                | 41               |
| • • • 600 pg/mL                | 11               |

Supplement: MOESM3 [file 9619390]
